# Supplementary material for: Synthesis of CVD-graphene on rapidly heated copper foils
Source: Royal Society of Chemistry journal article supplement (doi:10.1039/c3nr06434d), 2014-01-01
Supplement: c3nr06434d1.pdf [file c3nr06434d1.pdf]

## Supporting Information

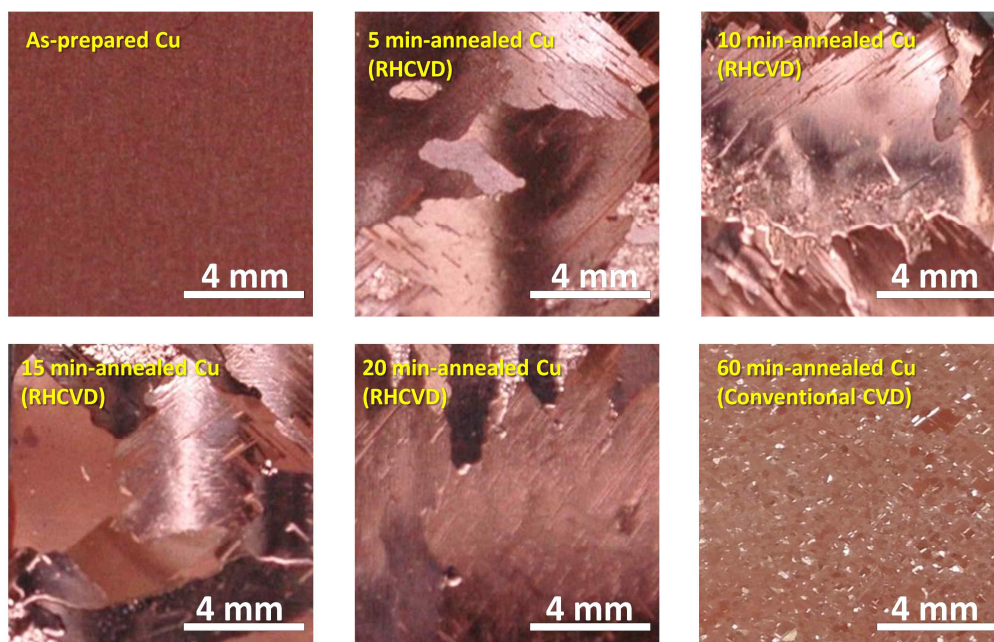

**Fig. S1 Comparison of grain size of the Cu.** The photographs show grain size evolution behaviors of polycrystalline Cu foils with annealing at 1000 °C for 5~20 min by RHCVD and for 60 min by CVD, respectively. The images of the copper foils were taken after annealing process, the surface of which was etched in APS solution of 1 hr.
